1 **Developing deep learning-based strategies to predict the risk of hepatocellular carcinoma**  
2 **among patients with nonalcoholic fatty liver disease from electronic health records**

3

4 Zhao Li, Ph.D.<sup>1</sup>, Lan Lan, Ph.D.<sup>1</sup>, Yujia Zhou, M.S.<sup>1</sup>, Ruoxing Li, M.S.<sup>1</sup>, Kenneth D. Chavin,  
5 M.D., MBA, PhD<sup>2</sup>, Hua Xu, Ph.D.<sup>3</sup>, Liang Li, Ph.D.<sup>4</sup>, David J. H. Shih, Ph.D.<sup>5</sup>, W. Jim Zheng,  
6 Ph.D.<sup>1,\*</sup>

7 <sup>1</sup> McWilliams School of Biomedical Informatics, University of Texas Health Science Center at Houston, 7000  
8 Fannin Street, Suite 600, Houston, Texas, 77030

9 <sup>2</sup> Department of Surgery, Case Western Reserve University School of Medicine, 11100 Euclid Ave, Cleveland OH  
10 44106

11 <sup>3</sup> Yale School of Medicine

12 <sup>4</sup> Department of Biostatistics, University of Texas MD Anderson Cancer Center, 1400 Pressler Street, FCT4.6008,  
13 Houston TX 77030

14 <sup>5</sup> School of Biomedical Sciences, University of Hong Kong

15 \*Corresponding Author: W. Jim Zheng, PhD, McWilliams School of Biomedical Informatics, University of Texas  
16 Health Science Center at Houston, 7000 Fannin St, Houston, TX 77030, USA (wenjin.j.zheng@uth.tmc.edu)

17

18 **Abstract**

19 **Background:** Deep learning models showed great success and potential when applied to many  
20 biomedical problems. However, the accuracy of deep learning models for many disease  
21 prediction problems is affected by time-varying covariates, rare incidence, and covariate  
22 imbalance when using structured electronic health records data. The situation is further  
23 exasperated when predicting the risk of one disease on condition of another disease, such as the  
24 hepatocellular carcinoma risk among patients with nonalcoholic fatty liver disease due to slow,  
25 chronic progression, the scarce of data with both disease conditions and the sex bias of the  
26 diseases.

27 **Objective:** The goal of this study is to investigate the extent to which time-varying covariates,  
28 rare incidence, and covariate imbalance influence deep learning performance, and then devised  
29 strategies to tackle these challenges. These strategies were applied to improve hepatocellular  
30 carcinoma risk prediction among patients with nonalcoholic fatty liver disease.

31 **Methods:** We evaluated two representative deep learning models in the task of predicting the  
32 occurrence of hepatocellular carcinoma in a cohort of patients with nonalcoholic fatty liver  
33 disease (n = 220,838) from a national EHR database. The disease prediction task was carefully  
34 formulated as a classification problem while taking censorship and the length of follow-up into  
35 consideration.

36 **Results:** We developed a novel backward masking scheme to evaluate how the length of  
37 longitudinal information after the index date affects disease prediction. We observed that  
38 modeling time-varying covariates improved the performance of the algorithms and transfer  
39 learning mitigated reduced performance caused by the lack of data. In addition, covariate  
40 imbalance, such as sex bias in data impaired performance. Deep learning models trained on one

41 sex and evaluated in the other sex showed reduced performance, indicating the importance of  
42 assessing covariate imbalance while preparing data for model training.

43 **Conclusions:** Devising proper strategies to address challenges from time-varying covariates,  
44 lack of data, and covariate imbalance can be key to counteracting data bias and accurately  
45 predicting disease occurrence using deep learning models. The novel strategies developed in this  
46 work can significantly improve the performance of hepatocellular carcinoma risk prediction  
47 among patients with nonalcoholic fatty liver disease. Furthermore, our novel strategies can be  
48 generalized to apply to other disease risk predictions using structured electronic health records,  
49 especially for disease risks on condition of another disease.

50

51 **Keywords:** deep learning, electronic health records, sex bias, hepatocellular carcinoma,  
52 nonalcoholic fatty liver disease

53

## 54 **Introduction**

55 Hepatocellular carcinoma (HCC) is one of the most common types of primary liver cancer in  
56 adults and one of the leading causes of cancer-related deaths worldwide [1, 2]. Besides the well-  
57 known risk factors associated with HCC, e.g., hepatitis C, hepatitis B and alcoholic cirrhosis,  
58 nonalcoholic fatty liver disease (NAFLD) has also been linked to HCC in the United States and  
59 worldwide [3]. The previous analysis identified non-alcoholic steatohepatitis accounting for the  
60 underlying etiology in a small-scale analysis [4] and recognized sex as an important factor.  
61 However, these previous studies were relatively small with very limited number of patients who  
62 developed HCC after diagnosis of the liver diseases.

63 The extensive deployment of electronic health records (EHR) systems in the United States has  
64 accumulated vast amounts of patient medical history data [5]. Meanwhile, artificial intelligence,  
65 especially deep learning has shown great promise in clinical informatics research at large scale.  
66 Various deep learning approaches have been employed to predict HCC risk using clinical data.  
67 Ioannou et al. [6] applied Recurrent Neural Network to predict the HCC development among  
68 patients with hepatitis C virus–related cirrhosis in the national Veterans Health Administration  
69 database. Similarly, researchers also employed Convolutional Neural Network-based models to  
70 predict HCC development among viral hepatitis patients and patients with cirrhosis [7, 8]. These  
71 studies showed deep learning methods can achieve superior performance over the conventional  
72 regression models but none of them applied deep learning for predicting HCC development in  
73 patients with NAFLD [9-11]. Therefore, applying the latest deep learning approaches to analyze  
74 EHR data from large cohorts of patients for accurate assessment of the risk of developing HCC  
75 in patients with NAFLD is desirable.

76 Machine learning models [12, 13], and more recently, deep learning models [14-16], are used  
77 for disease prediction on structured data from EHR. Despite their great promise and  
78 improvement in performance, several inherent data challenges persist in applying deep learning-  
79 based approaches for disease risk prediction. For example, censoring occurs when certain data  
80 points within a study are either incomplete or unknown due to factors such as being outside the  
81 study's time frame or scope, or other limitations. Censored data is very common in clinical,  
82 especially EHR-based research, because many patients will lose follow-up during the entire time  
83 frame of the clinical event of interest [17-19]. Current deep learning models often do not account  
84 for censoring in time-to-event data or have ad hoc design [19]. However, not properly accounting  
85 for censorship would lead to biased estimates of disease risk [20]. To utilize well-established  
86 machine learning algorithms for classification while handling censorship in time-to-event data,  
87 Craig et al. [21, 22] proposed to stack the features and outcomes of survival data at each  
88 timepoint into a single large table where the event time is cast as an additional covariate.  
89 However, this approach would lead to significant computing challenge for large datasets that are  
90 very common in EHR data. Additionally, the slow, chronic progression of diseases poses another  
91 challenge for disease risk prediction, as delayed diagnosis makes it difficult to predict future  
92 disease [23]. Time-varying covariates contain longitudinal information that could be important  
93 in disease risk prediction but have not been thoroughly evaluated while applying deep learning-  
94 based approaches [24-26]. Furthermore, deep learning-based approaches rely on large amounts  
95 of data for good performance, but predicting the risk of a disease in the context of another pre-  
96 existing disease typically results in small cohorts, as patients must satisfy the selection criteria  
97 for both diseases. To tackle this issue of data insufficiency, clinical concepts embeddings  
98 generated from a large EHR dataset were imported as initial embeddings based on other disease

99 prediction tasks [27]. A transformer-based model was pretrained by masked language modeling  
100 on a large EHR database and can be finetuned to downstream tasks with small sample sizes [28].  
101 However, the improvement of using these pretrained embeddings or models depends largely on  
102 the relatedness of the learning task and data during the pretraining stage and could be limited if  
103 the training data is dissimilar to the target data [29]. Besides these methodologic considerations,  
104 accurate predictions from machine learning models also strongly depend on the quality of input  
105 features and the training set [30]. Machine learning models may generate inferior or unreliable  
106 predictions if the unlabeled samples have dissimilar characteristics compared with the training  
107 set.

108 In this study, we investigate the impact of these challenges on performance of deep learning  
109 models in predicting disease risks from structured EHR data. We focus on hepatocellular  
110 carcinoma (HCC), one of the most common types of primary liver cancer in adults and one of the  
111 leading causes of cancer-related deaths worldwide [1, 2]. We predicted HCC risk among a large  
112 retrospective cohort of NAFLD patients (47% male and 53% female) from an EHR database  
113 containing records for over 68 million patients in the U.S. We formulated disease prediction as a  
114 classification problem while accounting for censoring and developed a novel approach to address  
115 delayed diagnosis by masking data before the diagnosis of disease. Our results demonstrate that  
116 time-varying covariate is a key factor influencing predictive performance. In addition, we  
117 established a new transfer learning paradigm for deep learning-based disease prediction on EHR  
118 data. Finally, we evaluated the impact of sex bias on deep learning performance and identified  
119 sex-specific features for HCC progression. Our study offers several key contributions. Firstly, we  
120 propose new approaches to preprocess event-to-event data from electronic health records  
121 (EHRs), which can improve the accuracy of downstream machine learning models. Secondly, we

122 identify biases in EHR data that were previously overlooked or neglected, highlighting the  
123 importance of careful data preprocessing in medical research. Finally, we propose a novel  
124 strategy, backward masking, to deal with the issue of delayed diagnosis which is very common in  
125 EHR data analysis. Given the abundance of existing machine learning models and the vast  
126 amounts of EHR data available, we believe that addressing the challenges associated with  
127 applying machine learning to EHRs has broader implications for related fields as well.

128

## 129 **Methods**

### 130 **Study Cohorts**

131 The data in this study were extracted from the Cerner Health Facts® database, which contains  
132 deidentified EHR data for more than 68 million patients for the years 2000 to 2017. We extracted  
133 all encounter records for patients who satisfied the inclusion and exclusion criteria for each  
134 patient set described below. These encounter records contain data about demographics,  
135 diagnoses, medications, lab tests, and clinical events. Since Cerner Health Facts® used both  
136 International Classification of Diseases version 9 and version 10 for patient diagnoses, we  
137 standardized the medical codes by converting all version 9 codes to version 10 codes. We used  
138 the generic name for medications, and we used LOINC codes for lab tests and clinical events.

139 Using the Cerner Health Facts® database, we created a set of patients with NAFLD and a case-  
140 control set. **Figure 1** shows the study flowchart.

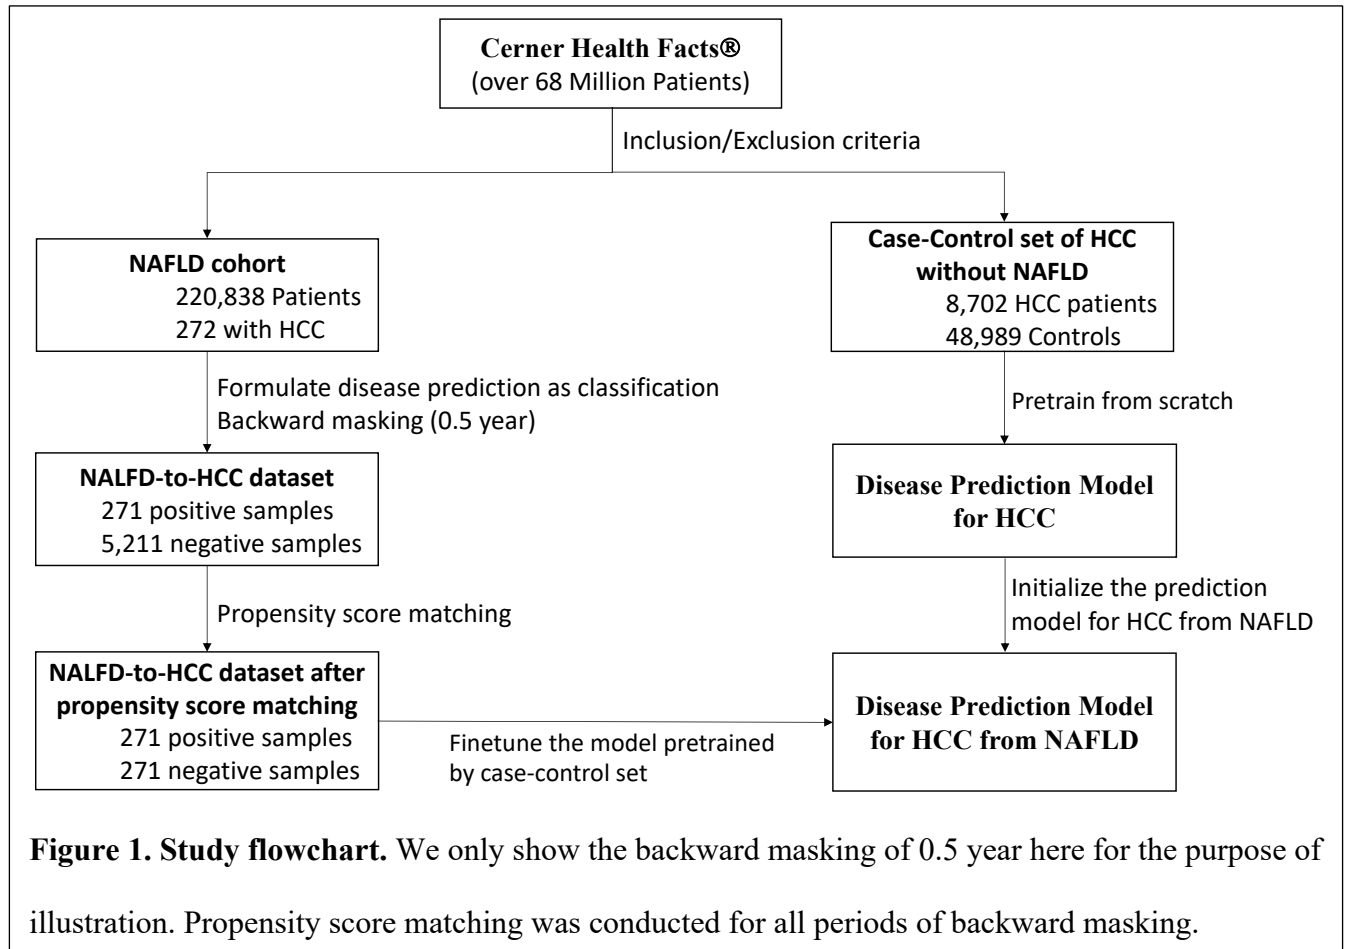

141

142 **NAFLD cohort.** Patients in this cohort had at least two abnormal alanine aminotransferase  
143 values over a > 6-month period [31]. Abnormal alanine aminotransferase values exceed 40  
144 IU/mL for men and 31 IU/mL for women. We defined the date of the first abnormal alanine  
145 aminotransferase test as the index date. Patients who were younger than 18 years old on the  
146 index date were excluded. To preserve sufficient follow-up and quality of the included data, we  
147 followed the inclusion and exclusion criteria used by Kanwal *et al* [31], and we thus excluded  
148 those patients with less than 5 years of data in the Cerner Health Facts® database after the index



149 date of NAFLD. Since the data is used to evaluate both baseline and deep learning methods, any  
150 bias introduced by this exclusion criteria will have minimal impact on our method evaluation and  
151 is outweighed by the benefit of resulting high quality data as demonstrated by many studies [31-  
152 34]. We excluded patients with hepatitis B or hepatitis C virus to eliminate the impact of these  
153 well-known risk factors for HCC. Finally, we excluded patients with a history of alcoholism or  
154 chronic hepatitis before the index date (**Figure 1**).

155

156 **Case-control patient set.** To increase the size of the NAFLD cohort for training a deep learning  
157 model to perform HCC prediction, we extracted all patients with HCC from the Cerner Health  
158 Facts® dataset and added a set of healthy patients as matched controls who were at least 18 years  
159 old at the first encounter and had not been diagnosed with NAFLD. A matching control patient  
160 was randomly sampled for each HCC patient at a ratio of 10:1 based on gender, age at the first  
161 encounter, and duration from the first to the last encounter (**Figure 1**).

162 The characteristics of the NAFLD cohort and the case-control set are summarized in **Table 1**.

163 **Table 1. Summary characteristics of patient sets.**

| Patient set      | # of patients | # of HCC patients | # of male patients | # of female patients | Avg. # of encounters per patient | Avg. # of codes in an encounter |
|------------------|---------------|-------------------|--------------------|----------------------|----------------------------------|---------------------------------|
| Case-control set | 57,691        | 8,702             | 28,881             | 28,810               | 24.14                            | 8.77                            |
| NAFLD cohort     | 220,838       | 272               | 88,637             | 132,201              | 56.58                            | 10.46                           |

164

## 165 **Study design**

166 Deep learning models are usually designed for classification, and often do not account for  
167 censoring. We are interested in applying state-of-the-art deep learning models designed for  
168 classification to identify risk factors, rather than to estimate absolute risk precisely. However, not

169 properly accounting for censorship can lead to biased estimates of disease risk [20]. Therefore,  
170 we carefully formulated disease prediction as a classification problem while considering  
171 censorship and the length of follow-up [22, 35].

172 We defined the event as the occurrence of HCC within 10 years after the index date using four  
173 individual patients as examples (**Figure 2**). Patients lost to follow-up for any reason, including  
174 death, were considered right-censored. We selected and labeled patients as shown in **Figure 2**.  
175 Patients who developed HCC after 10 years after index date were labeled as negative (Patient 1);  
176 those who did not develop HCC after the index date and were still in the Cerner Health Facts®  
177 database more than 10 years after the index date were also labeled as negative (Patient 2); the  
178 remaining patients were labeled as positive if they developed HCC within 10 years after index  
179 date (Patient 3); and all other patients were excluded (Patient 4). This last group of patients  
180 includes those who did not develop HCC but had less than 10 years of follow-up after the index  
181 date. Since there is insufficient information about whether these patients had developed HCC  
182 within 10 years of the index date, they do not have clear labels about their disease status at this  
183 time point, and they are thus not informative [17]. Under our criteria, patients who developed  
184 HCC before NAFLD were excluded, because we are interested in progression from NAFLD to  
185 HCC. Moreover, patients who developed HCC within 2 years after the index date were also  
186 excluded, since we focused on progression from NAFLD to HCC. If HCC is developed too  
187 quickly after NAFLD diagnosis, that means the patient might have HCC at the time NAFLD was  
188 diagnosed. This exclusion criterion might help the deep learning model pick up more meaningful  
189 predictive features for HCC prediction. Hence, the classification task for deep learning models is  
190 to estimate whether a patient with NAFLD will develop HCC within 10 years.

191 After the labeling process and backward masking (described below), we conducted propensity  
192 score matching to balance the ratio of positive and negative samples using the “MatchIt” R

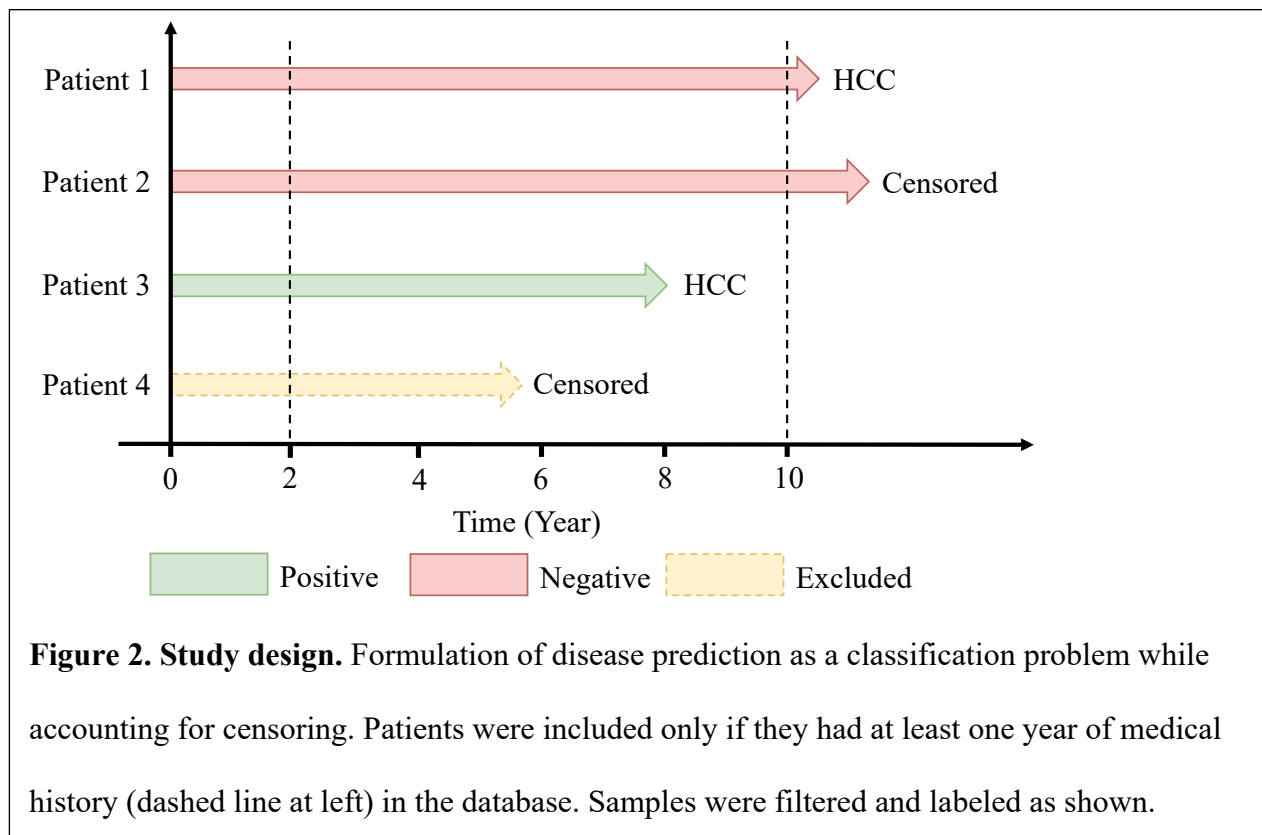

**Figure 2. Study design.** Formulation of disease prediction as a classification problem while accounting for censoring. Patients were included only if they had at least one year of medical history (dashed line at left) in the database. Samples were filtered and labeled as shown.

193 package. Features for conducting propensity score matching contain the mean and standard  
194 deviation of the time intervals among two successive encounters and the number of encounters  
195 for a patient. For each positive sample, we selected one control by performing greedy nearest-  
196 neighbor matching (**Figure 1**). The **Figure S1** shows the distribution of negative samples is  
197 closer to the positive samples after propensity score matching.

198

### 199 **Deep learning models and features**

200 We used the two most representative deep learning models for our study: RETAIN is a  
201 classification-based model [24] and DeepHit is a deep survival model [25, 26]. RETAIN is a  
202 recurrent neural network-based model that uses an attention mechanism [24]. The gated recurrent

203 unit inside RETAIN can efficiently use longitudinal medical information to predict disease  
204 progression. Meanwhile, a two-level attention module on top of the gated recurrent unit layers  
205 can generate the contribution weights of each feature (medical code) to the final prediction.  
206 Specifically, RETAIN first represents each medical code that is recorded in an encounter with a  
207 fixed-size, randomly initialized vector. All medical codes in an encounter are summed together  
208 to represent this encounter. Next, two gated recurrent unit layers with attention are used to  
209 generate the encounter-level and variable-level attention weights by the softmax function and  
210 hyperbolic tangent function, respectively. Finally, RETAIN represents each patient as a context  
211 vector that is a summation of all encounters, weighted by encounter-level and variable-level  
212 attention. Additionally, to mimic clinical practice, RETAIN takes the input of the EHR data in a  
213 reverse chronological order so that the model pays more attention to more recent encounters. A  
214 fully connected layer with the softmax activation function is used to calculate the final  
215 probability of the class labels, in this study HCC or no HCC. **Figure S2** shows the overview of  
216 RETAIN model. The input of RETAIN model contains the following features in all the included  
217 encounters: demographic (age, gender, race, and marital status), diagnosis codes (ICD 9 and ICD  
218 10 code), medications in the format of the generic medication name, lab test and clinical event  
219 (LOINC code).

220 Besides RETAIN, we also used a deep learning survival model, DeepHit [25, 26], to predict  
221 survival times while taking into account the competing risk of death. DeepHit uses the baseline  
222 information of the index date and employed a deep neural network to learn the relationship  
223 between the input variables and the distribution of the survival times. Furthermore, DeepHit can  
224 handle the competing risk by incorporating cause-specific sub-networks for each event and a  
225 shared sub-network to learn the feature representations. The loss function in DeepHit includes

226 the log-likelihood of the joint distribution of the first hitting time and corresponding event.  
227 Contrary to our application of RETAIN, we did not pre-process input data for censoring here  
228 because DeepHit handles censorship explicitly. However, while RETAIN uses the full  
229 longitudinal information of each patient for disease prediction, DeepHit only uses baseline  
230 information at the time of diagnosis of NAFLD. The complete list of baseline features is shown  
231 in **Table S1** in Supplementary Materials. Since DeepHit predicted the risk of HCC at each time  
232 point after the index date, to compare DeepHit to RETAIN, we transformed DeepHit outputs into  
233 the risk probability for HCC at 10 years after the index date. The Area Under the Receiver  
234 Operating Characteristic Curve (AUC) was the evaluation metric to benchmark these two  
235 methods [24, 36]. DeepHit and RETAIN are representative of two main categories of deep  
236 learning-based methods for disease prediction on EHR data: classification-based models that can  
237 use time-varying covariates to achieve more accurate predictions but do not properly account for  
238 censorship, which would lead to biased estimates of disease risk; deep survival models handle  
239 censorship properly but lack the capability to utilize time-varying covariates. In this analysis, we  
240 are not directly comparing DeepHit and RETAIN, but rather exploring whether modeling time-  
241 varying covariates with an unknown time-dependent function can lead to more accurate  
242 predictions.

243

#### 244 **Backward masking**

245 Due to the slow progression of HCC, some telltale signs and symptoms may be recorded in the  
246 medical record before a formal diagnosis code is recorded. However, we are interested in  
247 identifying risk factors, not well-known signs and symptoms of HCC. To mitigate the impact of  
248 delayed diagnosis, we trained multiple models by masking various lengths of medical history

249 backward from the date of HCC diagnosis (**Figure 3**). This masking led to four subgroups, in  
 250 which patient encounters within 0.5, 1, 2, or 4 years before HCC diagnosis or censoring are  
 251 masked. We varied the masking length to evaluate how the duration of longitudinal information  
 252 after the index date affects disease prediction. By masking different lengths of medical history of  
 253 each patient in the NAFLD-to-HCC dataset, we obtained the training and testing data for each

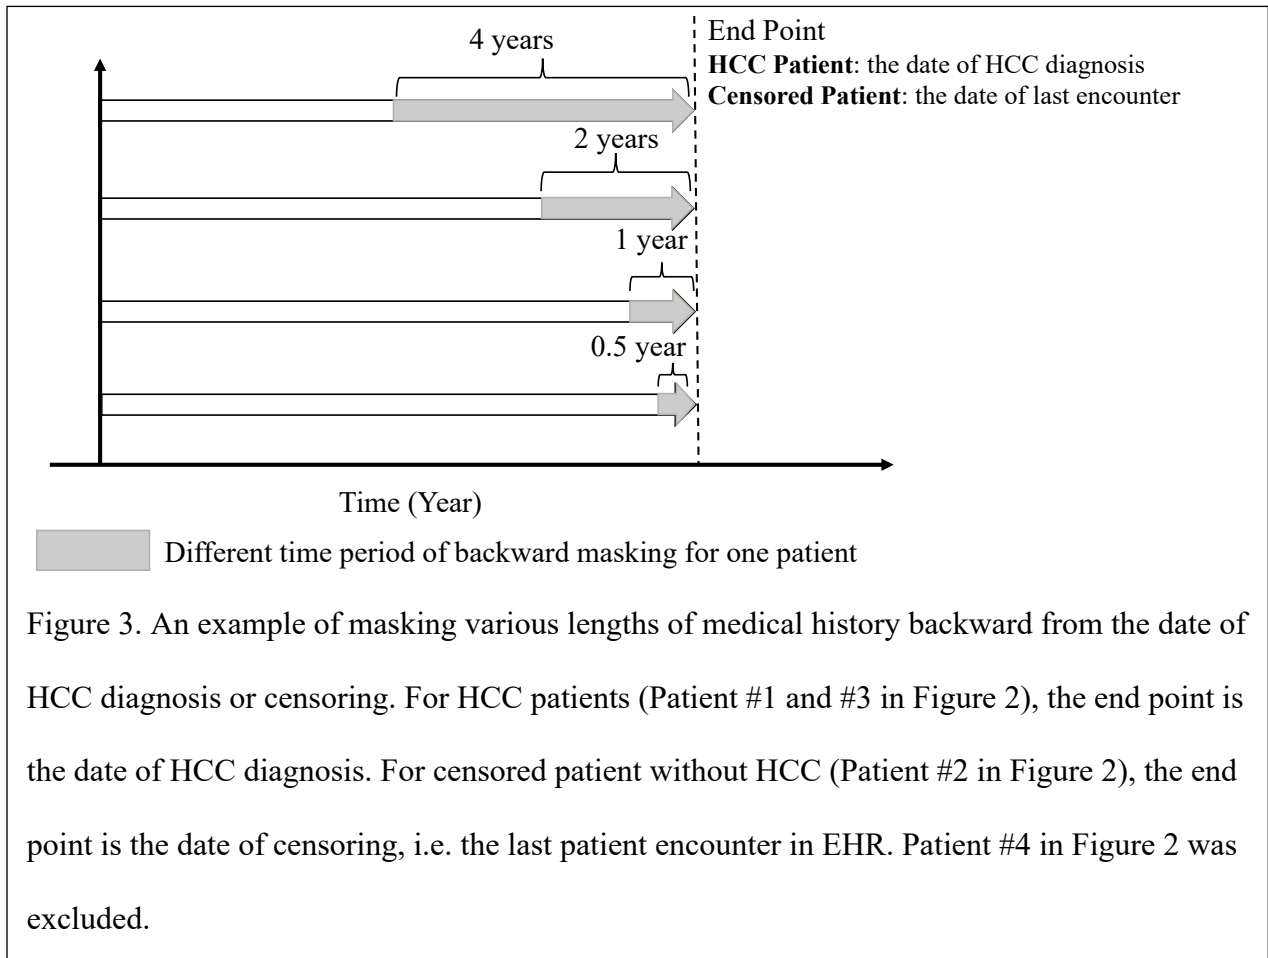

254 masking group to finetune and evaluate the model using five-fold cross validation.

255

### 256 **Transfer learning**

257 As shown in **Table 1**, there are only 272 HCC patients in the NAFLD cohort. Since a typical  
 258 deep learning model like RETAIN contains many learnable parameters, this sample would be

259 inadequate for finding an acceptable solution in such a large parameter space. A common  
260 approach for circumventing small sample sizes in EHR data is to use a general-purpose  
261 pretrained model, and fine-tune the embedding layers of the network on the target dataset [13,  
262 36]. In this study, we pretrained the whole model on a related prediction task for which a large  
263 dataset is available for training [27, 37, 38]. Specifically, we trained the deep learning on the  
264 larger case-control set, so that the model learns to recognize general patterns such as early  
265 symptoms and complications of HCC development. We then used this pretrained model and fine-  
266 tuned it on the NAFLD cohort, and we used cross-validation to evaluate the model's  
267 performance in predicting HCC among NAFLD patients. We used the same dictionary of  
268 medical codes and model architecture during pretraining and finetuning.

269

### 270 **Aggregated attention scores**

271 The attention scores outputted by the RETAIN model were employed to identify which factors  
272 contribute more to the prediction of HCC. Specifically, since RETAIN model output the  
273 attention scores for each code in all encounters and patients, we first calculated the mean of the  
274 attention score of each medical code across encounters for each patient to obtain the code-level  
275 importance score for this specific patient. Then we averaged the mean values of each code across  
276 different patients to obtain the importance value of each medical code within the cohort. Finally,  
277 we ranked the risk factors and protective factors by their cohort-level importance value and  
278 excluded medical codes observed in fewer than 10 patients. We applied this procedure to both  
279 male and female patients and identified sex-specific features for HCC progression.

280

### 281 **Results**

## 282 **Formulating disease prediction as a classification problem**

283 We compared the performance of two state-of-the-art deep learning algorithms for disease  
284 prediction: DeepHit and RETAIN. DeepHit incorporates a statistically rigorous competing risk  
285 model for fitting time-to-event data, while RETAIN is designed only for classification without  
286 consideration for censoring. However, DeepHit only considers covariate values at baseline,  
287 whereas RETAIN tracks changes in covariates across time. Since we are particularly interested  
288 in identifying risk factors and protective factors, rather than estimating absolute disease risk, we  
289 formulated disease prediction as a classification problem at a specified time point while  
290 accounting for censoring (Methods, **Figure 2**). We showed with Monte Carlo simulations that  
291 analyzing time-to-event data as a classification problem in this way allows us to identify risk  
292 factors reliably with strong control of type I error (Supplementary **Figure S3-5**).

293

## 294 **Modeling time-varying covariate improves disease prediction**

295 We evaluated the predictive performance of RETAIN and DeepHit by five-fold cross-validation.  
296 Overall, RETAIN achieved a consistently high AUC score of  $\sim 0.95$  on all patients, male patients,  
297 and female patients, outperforming DeepHit (**Figure 4**). The error bars show the standard  
298 deviations of the AUC scores across 5 folds. When considering all patients or men only,  
299 RETAIN outperformed DeepHit by about 0.1 in AUC score. Among female patients, RETAIN  
300 outperformed DeepHit by  $\sim 0.21$  in AUC score. We hypothesized that RETAIN outperformed  
301 DeepHit because the RETAIN model used more longitudinal information. Henceforth, we  
302 focused on evaluating the performance characteristics of the much superior deep learning model,  
303 RETAIN.



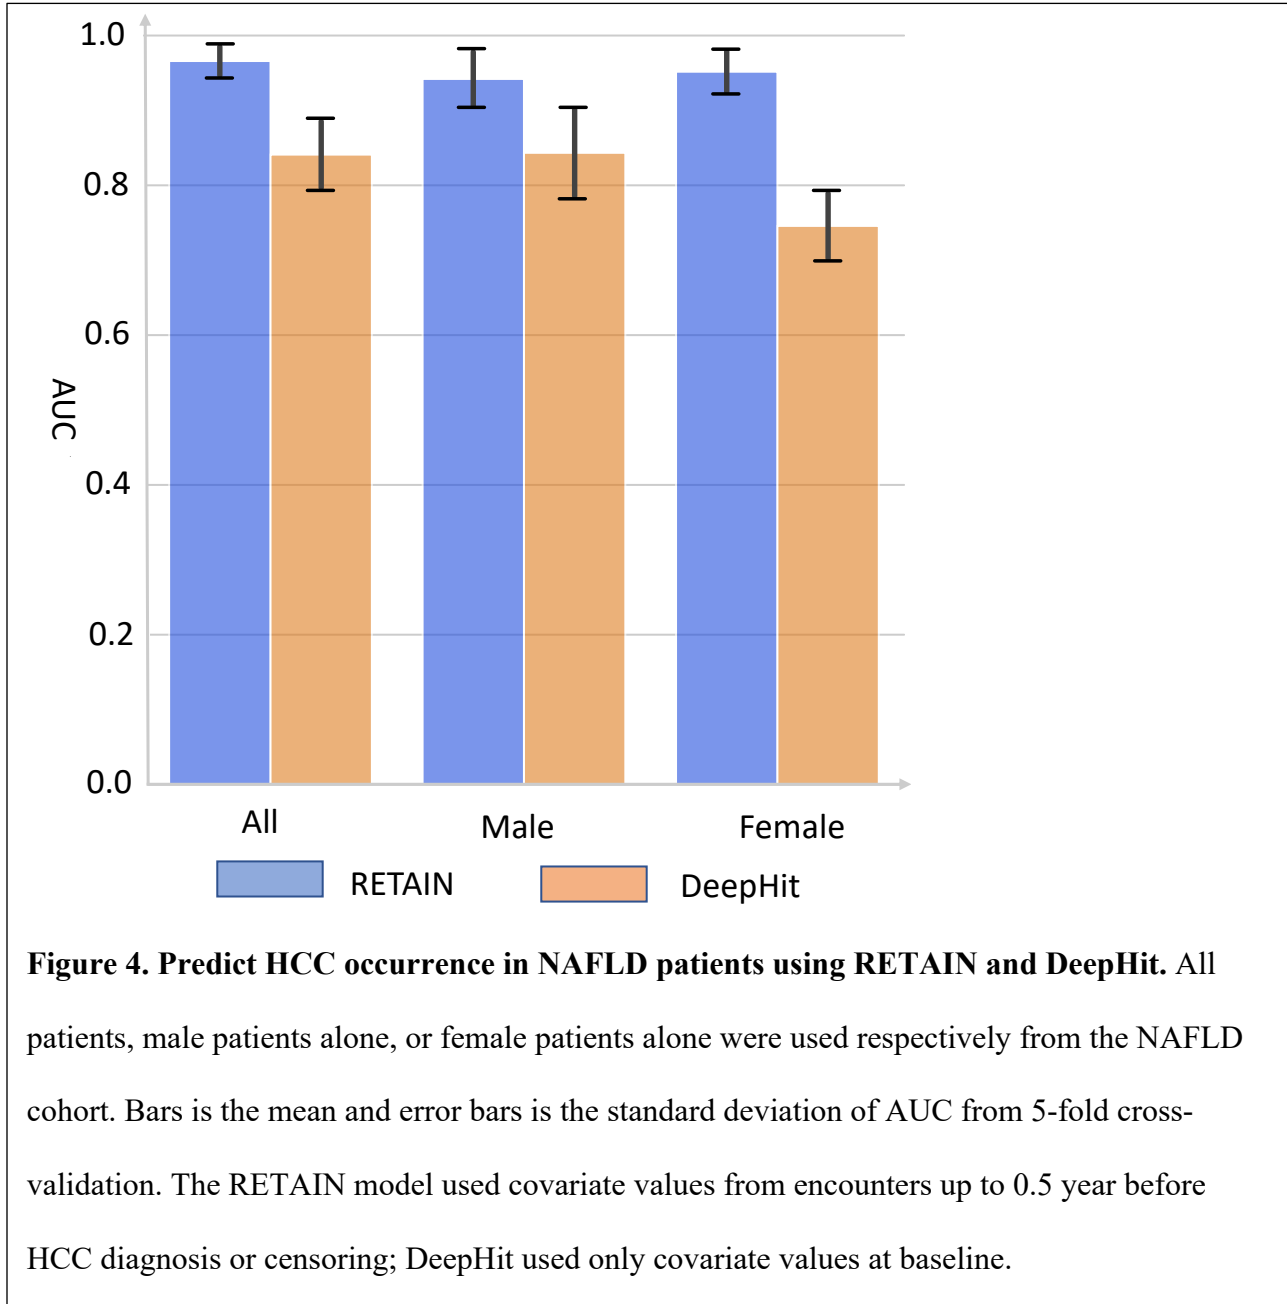

305

306 To test our hypothesis that time-varying covariates are critical to the superior predictive  
 307 performance of RETAIN, we performed backward masking on the covariate data. That is, we  
 308 masked data derived from encounters that occurred within 0.5, 1.0, 2.0, or 4.0 years before the  
 309 date of disease diagnosis (or the final encounter for patients who never developed HCC). Hence,

310 as we increased the masking length, more longitudinal information is withheld from the RETAIN  
 311 model. With longer backward masking, the average length of an available patient's medical  
 312 history decreased. Concomitant with less longitudinal information (i.e. shorter medical history  
 313 and fewer available encounters), the AUC score of RETAIN decreased from 0.966 to 0.906 for  
 314 models evaluated with cross-validation on all patients (**Table 2**). Even larger performance  
 315 reductions were observed for models trained and evaluated on only male or only female patients.  
 316 The AUC decreased to 0.838 and 0.828 for men and women, respectively. With 4 years of  
 317 backward masking, < 3 years of longitudinal data were available to RETAIN, which caused the  
 318 AUC performance of RETAIN to decline to comparable levels as those achieved by DeepHit  
 319 using only baseline covariates (**Table 2, Figure 4**). Taken together, these results indicate that  
 320 RETAIN relies on the use of time-varying covariate values beyond baseline to achieve superior  
 321 performance.

322

323 **Table 2. The performance characteristics of RETAIN for different lengths of backward masking.**

| <i>Masking length (yrs)</i>  |        | <i>0.5</i>   | <i>1.0</i>   | <i>2.0</i>   | <i>4.0</i>   |
|------------------------------|--------|--------------|--------------|--------------|--------------|
| <i>Medical history (yrs)</i> | Mean   | 7.16         | 6.37         | 5.14         | 2.93         |
|                              | Median | 7.27         | 6.43         | 5.05         | 2.84         |
| <i>Mean AUC (SD)</i>         | All    | 0.966(0.019) | 0.955(0.008) | 0.945(0.023) | 0.906(0.026) |
|                              | Male   | 0.942(0.036) | 0.908(0.035) | 0.914(0.046) | 0.838(0.057) |
|                              | Female | 0.952(0.027) | 0.920(0.036) | 0.927(0.023) | 0.828(0.101) |

324

325 **Transfer learning improves model performance.**

326 We evaluated the extent to which transfer learning improved RETAIN performance. In our  
 327 NAFLD cohort, only 2 of 1000 NAFLD patients developed HCC after 10 years beyond the index  
 328 date. Due to the rare incidence of HCC among NAFLD patients, we pretrained RETAIN models  
 329 on the larger set of patients who developed HCC (excluding NAFLD patients) and control

330 patients who never developed HCC. We then fine-tuned these pretrained models on the NAFLD  
331 cohort. With transfer learning, AUC performances substantially increased, with improvements in  
332 AUC ranging from 0.019 to 0.095 across different lengths of backward masking (**Table 3**). The  
333 paired T-test was conducted to measure the statistical significance of using TL under different  
334 conditions in the AUC scores from 5 folds. The AUC after TL was subtracted from the AUC  
335 before TL, so the alternative hypothesis assumes that the mean difference of AUC after using TL  
336 is less than zero, which means the AUC after TL is larger than the AUC without TL. The  
337 improvement was statistically significant with Transfer Learning under many conditions.  
338 Transfer learning also reduced the validation loss (Supplementary **Figure S6**). These results  
339 indicate that RETAIN learned generalizable patterns from the larger case-control HCC dataset  
340 and that this information helped RETAIN achieved better performance on the smaller cohort of  
341 interest. Furthermore, greater improvements were observed with longer backward masking  
342 (**Table 3**). For example, the AUC improved 0.065 and 0.08 with less than 2 years masking for  
343 male and female patients, respectively. However, the improvements were just 0.019 and 0.038  
344 with 0.5 year of backward masking. Moreover, models applied only in women achieved  
345 consistently higher improvement than models applied only in men, irrespective of masking  
346 length (**Table 3**).

347

348 **Table 3. AUC performances of RETAIN models with and without transfer learning (TL).**

| <i>Masking length (yrs)</i> | All          |                 | Male         |               | Female       |               |
|-----------------------------|--------------|-----------------|--------------|---------------|--------------|---------------|
|                             | without TL   | with TL         | without TL   | with TL       | without TL   | with TL       |
| 0.5                         | 0.932(0.020) | 0.966(0.019)*** | 0.923(0.027) | 0.942(0.036)  | 0.914(0.045) | 0.952(0.027)* |
| 1.0                         | 0.900(0.042) | 0.955(0.008)*   | 0.867(0.046) | 0.908(0.035)* | 0.873(0.031) | 0.920(0.036)* |
| 2.0                         | 0.918(0.028) | 0.945(0.023)*   | 0.849(0.047) | 0.914(0.046)  | 0.847(0.063) | 0.927(0.023)* |
| 4.0                         | 0.877(0.024) | 0.906(0.026)*   | 0.801(0.028) | 0.838(0.057)  | 0.733(0.139) | 0.828(0.101)  |

349 Cell values contain mean (SD) of cross-validation AUC. \* The p-value of paired T-test with TL is less than 0.05, \*\*\*  
 350 The p-value is less than 0.001. The alternative hypothesis assumes that the mean difference of AUC after using TL  
 351 is less than zero.

352

353 **Sex bias impacts model performance**

354 Gender disparity in HCC morbidity and survival outcome has been extensively studied and  
 355 documented [10, 39-43]. However, Prior studies on HCC risk were either small [3, 4] or sex-  
 356 biased where 94.4% of patients in the study were male [31], which may have led to biased  
 357 results. Therefore, investigating sex bias in HCC can improve our understanding of how sex-  
 358 based differences affect outcomes and help ensure data fairness in AI applications [40, 44]. To  
 359 assess how sex bias in data affects the performance of deep learning, we trained RETAIN models  
 360 on one sex and evaluated them in the other sex. As shown in **Table 4**, the model trained using  
 361 male patients achieved inferior performance in female patients, as the AUC decreased from  
 362 0.927 to 0.834 with 2 years of backward masking. When applying the model trained on female  
 363 patients with 4 years of backward masking, the performance for male prediction decreased from  
 364 0.838 to 0.773. These results are consistent with the concept that sex influences HCC risk, and  
 365 there could be male- and female-specific features learned by the model that can only perform  
 366 well in predicting HCC risks in that sex. As expected, the model trained on the data with both  
 367 sexes achieved better performance than that trained on the data for either sex alone.

368

369 **Table 4. The performance of RETAIN trained and evaluated on different subgroups.** The scores are the  
 370 average AUC (SD) from cross-validation.

| Predicted group | Trained with | Masking length (years) |              |                     |                     |
|-----------------|--------------|------------------------|--------------|---------------------|---------------------|
|                 |              | 0.5                    | 1            | 2                   | 4                   |
| Male            | All*         | 0.965(0.030)           | 0.948(0.019) | 0.931(0.041)        | 0.900(0.050)        |
|                 | Male         | 0.942(0.036)           | 0.908(0.035) | 0.914(0.046)        | <b>0.838(0.057)</b> |
|                 | Female       | 0.890(0.059)           | 0.848(0.051) | 0.873(0.046)        | <b>0.773(0.065)</b> |
| Female          | All          | 0.964(0.018)           | 0.964(0.014) | 0.960(0.026)        | 0.916(0.009)        |
|                 | Male         | 0.905(0.038)           | 0.878(0.040) | <b>0.834(0.028)</b> | 0.806(0.086)        |
|                 | Female       | 0.952(0.027)           | 0.920(0.036) | <b>0.927(0.023)</b> | 0.828(0.101)        |

371 \* Trained on both male and female patients.  
 372

### 373 Sex-specific features

374 To understand why RETAIN achieves different predictive performances in male vs. female  
 375 patients, we analyzed aggregated attention scores obtained from the model. As shown in **Table**  
 376 **S2-S5** in Supplementary Materials, we identified medical codes with positive attention scores  
 377 and negative attention scores for male and female patients. Some common and well-known risk  
 378 factors or complications of HCC are ranked high in all patients, e.g., high body mass index,  
 379 abnormal aspartate transferase values, and the presence of type 2 diabetes mellitus. Specifically  
 380 for women, rheumatoid arthritis is associated with positive attention scores, and kidney stones  
 381 are associated with negative attention scores.

382 To illustrate how RETAIN makes a specific prediction, in **Figure 5** we depict the attention  
 383 scores of codes for a specific patient who developed HCC, which was correctly predicted. We  
 384 filtered out the codes whose attention scores are between the 25<sup>th</sup> percentile and the 75<sup>th</sup>  
 385 percentile in all encounters to make the figure readable. In the RETAIN prediction for this  
 386 patient, normal lab results for tests such as platelet count and aspartate transferase were possible  
 387 protective factors, whereas type 2 diabetes, hypertension, and elevated aspartate transferase were  
 388 possible risk factors. Being a non-smoker was associated with a positive attention score.

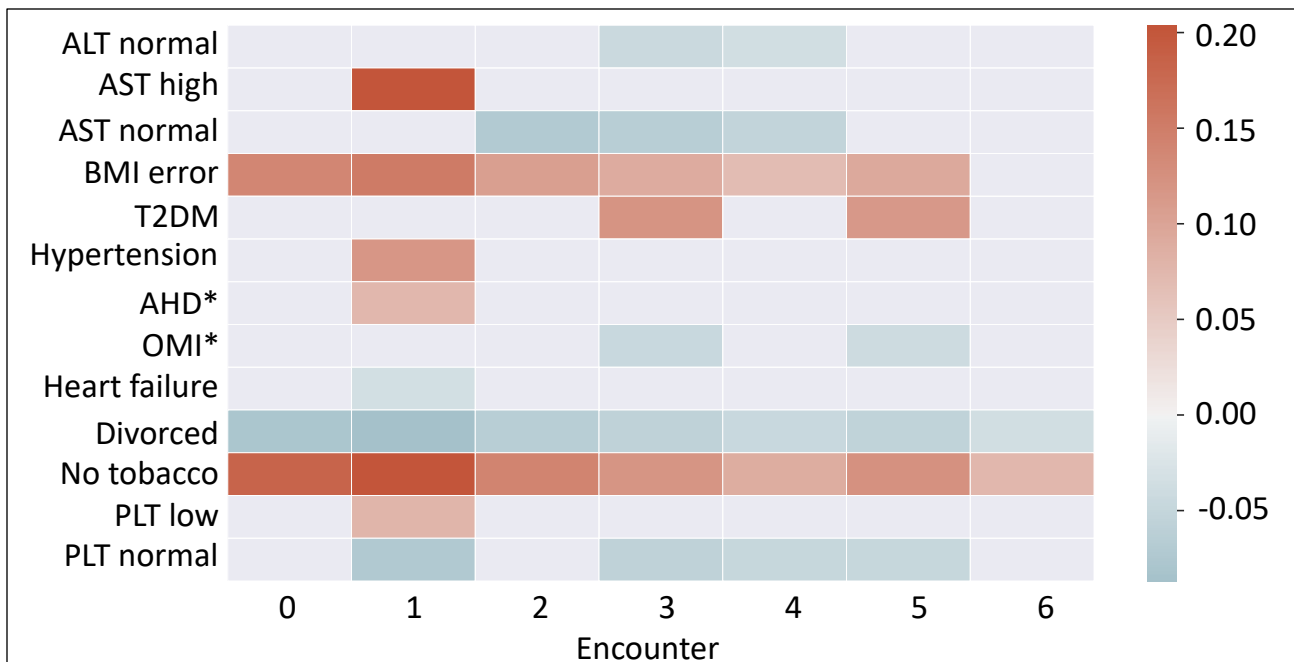

**Figure 5. Visualization of RETAIN attention scores for a patient.** Codes with attention scores higher than 75<sup>th</sup> percentile or lower than 25<sup>th</sup> percentile in at least one encounter are plotted. The color range represents the associated attention scores from the model. “BMI error” means the BMI value in the EHR database is invalid (negative or empty). AHD: Atherosclerotic Heart Disease. OMI: Old Myocardial Infarction.

389

390 **Discussion**

391 We highlight key areas of innovation in our work for the application of deep learning in medical  
 392 informatics. To compare deep learning algorithms using the same evaluation measure, we  
 393 formulated disease prediction as a classification problem while taking censoring into account. To  
 394 account for delayed disease diagnosis, we propose a backward masking approach, which  
 395 prevents deep learning models that incorporate time-varying covariates from identifying telltale  
 396 signs and symptoms of the disease rather than risk factors. Additionally, we showed that  
 397 incorporating time-varying covariates with a deep learning model, such as RETAIN, can  
 398 improve the AUC performance of the classification-based disease prediction. We then

399 demonstrate that transfer learning improves predictive performance when the data set is limited  
400 by having insufficient number of cases. Further, we demonstrated that sex bias adversely impacts  
401 deep learning performance, and we identified sex-specific features for HCC progression.

402 Delayed diagnosis is common in clinical practice, and failure to take this issue into account  
403 may cause deep learning algorithms to identify trivial features that are not of interest to the  
404 clinical community. Patients have prescribed medications or diagnosed with symptoms for some  
405 diseases, but the actual entry of the diagnosis code for this disease can be delayed for quite some  
406 time due to factors including laboratory test confirmation and clerical errors. This delayed entry  
407 of the diagnosis code thus allows deep learning algorithms to predict disease status effortlessly  
408 using telltale symptoms or prescribed medications for the disease. To mitigate this issue, we  
409 designed a new masking strategy to investigate how delayed diagnosis impacts deep learning  
410 models that use longitudinal information. When we mask for a sufficient length of time before  
411 the formal diagnosis of the disease, we can prevent deep learning algorithms from using trivial  
412 features of the disease and allow the algorithms to identify more subtle patterns of features that  
413 help us gain critical clinical insights into the etiology and progression of the disease. Although  
414 some survival analyses can use the time-varying variates to make predictions at different time  
415 points (horizons) prior to death by manual feature selection, this is different from our design  
416 which aims to solve the issue of delayed diagnosis and telltale symptoms [45].

417 Using backward masking, we demonstrated that modeling time-varying covariate of features  
418 contributes strongly to disease prediction. When we masked patient encounters that occurred  
419 within four years of HCC diagnosis, the predictive performance of RETAIN (which models  
420 time-varying features) decreased to similar levels as that of DeepHit (which only models  
421 baseline features). This finding indicates that the improved disease prediction performance of

422 RETAIN over DeepHit is due to the modeling of time-varying covariate of the features.  
423 Accordingly, incorporating time-varying covariates can be key to achieving optimal performance  
424 for disease prediction.

425 Furthermore, we showed that transfer learning can be used to remedy the rarity of positive  
426 examples. We recognized that despite beginning with a large cohort of millions of patients, the  
427 subset of patients who experienced the outcome event is relatively small. Different from the prior  
428 studies which typically adopt the embedding vectors of medical codes learned from a general  
429 task [27] or finetune a large pretrained model which was trained on diverse but unrelated medical  
430 conditions [28], we first trained a randomly initialized model on a related problem with large  
431 sample size, and finetuned the trained model on the target problem. We demonstrated that the  
432 application of this transfer learning strategy yielded a remarkable improvement in predictive  
433 performance. This improvement also indicates that although the larger, related dataset contains  
434 cases that are not of primary interest, they may share general patterns that help deep learning  
435 algorithms discern the disease of interest. Pretraining on the larger, related dataset thus improved  
436 prediction on the smaller target dataset.

437

### 438 **Acknowledgements**

439 This work is partly supported by the National Institutes of Health (NIH) through grant  
440 1UL1TR003167, 1R01AG066749-01, DoD W81XWH2210164 and the Cancer Prevention and  
441 Research Institute of Texas through grant RP170668 (WJZ). W.J.Z. conceived of the project.  
442 W.J.Z., D.J.H.S. and Z.L. designed and coordinated the study. Z.L., L. Lan, and Y.Z.  
443 preprocessed the data. Z.L. performed the deep learning model training and evaluation. R.L.  
444 performed the statistical simulations. K.D.C provided clinical advice. L. Li provided statistical



445 guidance for the study. D.J.H.S., Z.L., L. Lan, and R.L. wrote the manuscript. All authors read  
446 and approved the final manuscript. We acknowledge the use of “Cerner Health Facts®” and the  
447 assistance provided by UTHHealth SBMI Data Service team to extract data.

448

449 **Conflicts of Interest**

450 None declared.

## References

1. Forner A, Llovet JM, Bruix J: **Hepatocellular carcinoma**. *The Lancet (British edition)* 2012, **379**(9822):1245-1255.
2. Venook AP, Papandreou C, Furuse J, Ladrón de Guevara L: **The Incidence and Epidemiology of Hepatocellular Carcinoma: A Global and Regional Perspective**. *The oncologist (Dayton, Ohio)* 2010, **15**(S4):5-13.
3. Williams CD, Stengel J, Asike MI, Torres DM, Shaw J, Contreras M, Landt CL, Harrison SA: **Prevalence of nonalcoholic fatty liver disease and nonalcoholic steatohepatitis among a largely middle-aged population utilizing ultrasound and liver biopsy: a prospective study**. *Gastroenterology* 2011, **140**(1):124-131.
4. Ertle J, Dechêne A, Sowa JP, Penndorf V, Herzer K, Kaiser G, Schlaak JF, Gerken G, Syn WK, Canbay A: **Non-alcoholic fatty liver disease progresses to hepatocellular carcinoma in the absence of apparent cirrhosis**. *International journal of cancer* 2011, **128**(10):2436-2443.
5. Choi E, Bahadori MT, Schuetz A, Stewart WF, Sun J: **Doctor AI: Predicting Clinical Events via Recurrent Neural Networks**. *JMLR workshop and conference proceedings* 2016, **56**:301-318.
6. Ioannou GN, Tang W, Beste LA, Tincopa MA, Su GL, Van T, Tapper EB, Singal AG, Zhu J, Waljee AK: **Assessment of a deep learning model to predict hepatocellular carcinoma in patients with hepatitis C cirrhosis**. *JAMA network open* 2020, **3**(9):e2015626-e2015626.
7. Phan DV, Chan CL, Li AHA, Chien TY, Nguyen VC: **Liver cancer prediction in a viral hepatitis cohort: A deep learning approach**. *International Journal of Cancer* 2020, **147**(10):2871-2878.
8. Nam JY, Sinn DH, Bae J, Jang ES, Kim J-W, Jeong S-H: **Deep learning model for prediction of hepatocellular carcinoma in patients with HBV-related cirrhosis on antiviral therapy**. *JHEP Reports* 2020, **2**(6):100175.
9. Ahn JC, Qureshi TA, Singal AG, Li D, Yang J-D: **Deep learning in hepatocellular carcinoma: Current status and future perspectives**. *World Journal of Hepatology* 2021, **13**(12):2039.
10. Huang FY, Wong DK, Seto WK, Lai CL, Yuen MF: **Estradiol induces apoptosis via activation of miRNA-23a and p53: implication for gender difference in liver cancer development**. *Oncotarget* 2015, **6**(33):34941-34952.
11. Shah PA, Patil R, Harrison SA: **NAFLD-related hepatocellular carcinoma: The growing challenge**. *Hepatology* 2022.
12. Shickel B, Tighe PJ, Bihorac A, Rashidi P: **Deep EHR: a survey of recent advances in deep learning techniques for electronic health record (EHR) analysis**. *IEEE journal of biomedical and health informatics* 2017, **22**(5):1589-1604.
13. Si Y, Du J, Li Z, Jiang X, Miller T, Wang F, Zheng WJ, Roberts K: **Deep representation learning of patient data from Electronic Health Records (EHR): a systematic review**. *arXiv preprint arXiv:201002809* 2020.

14. Tran T, Nguyen TD, Phung D, Venkatesh S: **Learning vector representation of medical objects via EMR-driven nonnegative restricted Boltzmann machines (eNRBM)**. *Journal of biomedical informatics* 2015, **54**:96-105.
15. Choi E, Bahadori MT, Schuetz A, Stewart WF, Sun J: **Doctor ai: Predicting clinical events via recurrent neural networks**. In: *Machine Learning for Healthcare Conference: 2016*. 301-318.
16. Choi E, Xu Z, Li Y, Dusenberry MW, Flores G, Xue Y, Dai AM: **Graph Convolutional Transformer: Learning the Graphical Structure of Electronic Health Records**. *arXiv preprint arXiv:190604716* 2019.
17. Klein JP, Moeschberger ML, collection EBe: **Survival Analysis : Techniques for Censored and Truncated Data**, 2nd 2003. edn. New York, NY: Springer New York : Imprint: Springer; 2003.
18. Schluchter MD, Greene T, Beck GJ: **Analysis of change in the presence of informative censoring: application to a longitudinal clinical trial of progressive renal disease**. *Statistics in medicine* 2001, **20**(7):989-1007.
19. Vock DM, Wolfson J, Bandyopadhyay S, Adomavicius G, Johnson PE, Vazquez-Benitez G, O'Connor PJ: **Adapting machine learning techniques to censored time-to-event health record data: A general-purpose approach using inverse probability of censoring weighting**. *Journal of biomedical informatics* 2016, **61**:119-131.
20. Katzman JL, Shaham U, Cloninger A, Bates J, Jiang T, Kluger Y: **DeepSurv: personalized treatment recommender system using a Cox proportional hazards deep neural network**. *BMC medical research methodology* 2018, **18**(1):1-12.
21. Craig E, Zhong C, Tibshirani R: **Survival stacking: casting survival analysis as a classification problem**. *arXiv preprint arXiv:210713480* 2021.
22. Zhong C, Tibshirani R: **Survival analysis as a classification problem**. *arXiv preprint arXiv:190911171* 2019.
23. Ofosu A, Ramai D, Reddy M: **Non-alcoholic fatty liver disease: controlling an emerging epidemic, challenges, and future directions**. *Ann Gastroenterol* 2018, **31**(3):288-295.
24. Choi E, Bahadori MT, Sun J, Kulas J, Schuetz A, Stewart W: **Retain: An interpretable predictive model for healthcare using reverse time attention mechanism**. In: *Advances in Neural Information Processing Systems: 2016*. 3504-3512.
25. Lee C, Yoon J, Van Der Schaar M: **Dynamic-deephit: A deep learning approach for dynamic survival analysis with competing risks based on longitudinal data**. *IEEE Transactions on Biomedical Engineering* 2019, **67**(1):122-133.
26. Lee C, Zame W, Yoon J, van der Schaar M: **Deephit: A deep learning approach to survival analysis with competing risks**. In: *Proceedings of the AAAI Conference on Artificial Intelligence: 2018*.
27. Xiang Y, Xu J, Si Y, Li Z, Rasmy L, Zhou Y, Tiryaki F, Li F, Zhang Y, Wu Y: **Time-sensitive clinical concept embeddings learned from large electronic health records**. *BMC medical informatics and decision making* 2019, **19**(2):139-148.
28. Rasmy L, Xiang Y, Xie Z, Tao C, Zhi D: **Med-BERT: pretrained contextualized embeddings on large-scale structured electronic health records for disease prediction**. *NPJ digital medicine* 2021, **4**(1):1-13.

29. Xue Y, Du N, Mottram A, Seneviratne M, Dai AM: **Learning to select best forecast tasks for clinical outcome prediction.** *Advances in Neural Information Processing Systems* 2020, **33**:15031-15041.
30. Murphy KP: **Machine learning: a probabilistic perspective:** MIT press; 2012.
31. Kanwal F, Kramer JR, Mapakshi S, Natarajan Y, Chayanupatkul M, Richardson PA, Li L, Desiderio R, Thrift AP, Asch SM *et al*: **Risk of Hepatocellular Cancer in Patients With Non-Alcoholic Fatty Liver Disease.** *Gastroenterology* 2018, **155**(6):1828-1837.e1822.
32. Pittet D, Wyssa B, Herter-Clavel C, Kursteiner K, Vaucher J, Lew PD: **Outcome of diabetic foot infections treated conservatively: a retrospective cohort study with long-term follow-up.** *Arch Intern Med* 1999, **159**(8):851-856.
33. White IK, Shaikh KA, Moore RJ, Bullis CL, Sami MT, Gianaris TJ, Fulkerson DH: **Risk of radiation-induced malignancies from CT scanning in children who underwent shunt treatment before 6 years of age: a retrospective cohort study with a minimum 10-year follow-up.** *J Neurosurg Pediatr* 2014, **13**(5):514-519.
34. Yu Z, Chen J, Cheng X, Xie D, Chen Y, Zou X, Peng X: **Patients with degenerative cervical myelopathy exhibit neurophysiological improvement upon extension and flexion: a retrospective cohort study with a minimum 1-year follow-up.** *BMC Neurol* 2022, **22**(1):110.
35. Ranganath R, Perotte A, Elhadad N, Blei D: **Deep survival analysis.** In: *Machine Learning for Healthcare Conference: 2016.* PMLR: 101-114.
36. Rasmy L, Wu Y, Wang N, Geng X, Zheng WJ, Wang F, Wu H, Xu H, Zhi D: **A study of generalizability of recurrent neural network-based predictive models for heart failure onset risk using a large and heterogeneous EHR data set.** *Journal of biomedical informatics* 2018, **84**:11-16.
37. Gopalakrishnan K, Khaitan SK, Choudhary A, Agrawal A: **Deep Convolutional Neural Networks with transfer learning for computer vision-based data-driven pavement distress detection.** *Construction and Building Materials* 2017, **157**:322-330.
38. Pan SJ, Yang Q: **A survey on transfer learning.** *IEEE Transactions on knowledge and data engineering* 2009, **22**(10):1345-1359.
39. Wu EM, Wong LL, Hernandez BY, Ji JF, Jia W, Kwee SA, Kalathil S: **Gender differences in hepatocellular cancer: disparities in nonalcoholic fatty liver disease/steatohepatitis and liver transplantation.** *Hepatoma research* 2018, **4**.
40. Li Y, Xu A, Jia S, Huang J: **Recent advances in the molecular mechanism of sex disparity in hepatocellular carcinoma.** *Oncology letters* 2019, **17**(5):4222-4228.
41. Mauvais-Jarvis F, Bairey Merz N, Barnes PJ, Brinton RD, Carrero JJ, DeMeo DL, De Vries GJ, Epperson CN, Govindan R, Klein SL *et al*: **Sex and gender: modifiers of health, disease, and medicine.** *Lancet* 2020, **396**(10250):565-582.
42. Costa AR, Lança de Oliveira M, Cruz I, Gonçalves I, Cascalheira JF, Santos CRA: **The Sex Bias of Cancer.** *Trends in endocrinology and metabolism: TEM* 2020, **31**(10):785-799.
43. Pan JJ, Fallon MB: **Gender and racial differences in nonalcoholic fatty liver disease.** *World journal of hepatology* 2014, **6**(5):274-283.
44. Bellamy RK, Dey K, Hind M, Hoffman SC, Houde S, Kannan K, Lohia P, Martino J, Mehta S, Mojsilovic A: **AI Fairness 360: An extensible toolkit for detecting, understanding, and mitigating unwanted algorithmic bias.** *arXiv preprint arXiv:181001943* 2018.

45. Schwab P, Mehrjou A, Parbhoo S, Celi LA, Hetzel J, Hofer M, Schölkopf B, Bauer S: **Real-time prediction of COVID-19 related mortality using electronic health records.** *Nat Commun* 2021, **12**(1):1058.

## **Abbreviations**

**EHR:** electronic health records

**NAFLD:** nonalcoholic fatty liver disease

**HCC:** hepatocellular carcinoma

**AUC:** Area Under the Receiver Operating Characteristic Curve
